# Supplementary material for: Accelerometric Assessment of Postural Balance in Children: A Systematic Review
Source: Diagnostics (Basel). 2020 Dec 22;11(1):8. doi: 10.3390/diagnostics11010008 (PMC7822105; doi:10.3390/diagnostics11010008)
Supplement: Supplementary file 1 [file diagnostics-11-00008-s001.pdf]

**Table S1.** Quality assessment of included articles

| Quality Index Item                                                                    | Brett et al. <sup>31</sup> (2018) | Cheng et al. <sup>38</sup> (2019) | Crossley et al. <sup>39</sup> (2018) | Fong et al. <sup>45</sup> (2015) | García-Liñeira et al. <sup>46</sup> (2020) | García-Soidán et al. <sup>47</sup> (2020) |
|---------------------------------------------------------------------------------------|-----------------------------------|-----------------------------------|--------------------------------------|----------------------------------|--------------------------------------------|-------------------------------------------|
| Were the research objectives or aims clearly stated?                                  | 2                                 | 2                                 | 2                                    | 2                                | 2                                          | 2                                         |
| Was the study design clearly described?                                               | 0                                 | 2                                 | 0                                    | 2                                | 2                                          | 2                                         |
| Was the study population adequately described?                                        | 2                                 | 2                                 | 2                                    | 2                                | 2                                          | 2                                         |
| Were the eligibility criteria specified?                                              | 1                                 | 2                                 | 0                                    | 2                                | 2                                          | 2                                         |
| Was the sampling methodology appropriately described?                                 | 0                                 | 1                                 | 0                                    | 0                                | 0                                          | 0                                         |
| Was the sample size used justified?                                                   | 0                                 | 2                                 | 0                                    | 1                                | 0                                          | 0                                         |
| Did the method description enable accurate replication of the measurement procedures? | 0                                 | 0                                 | 2                                    | 1                                | 1                                          | 2                                         |
| Was the equipment design and set up clearly described?                                | 0                                 | 0                                 | 1                                    | 2                                | 2                                          | 2                                         |
| Were accelerometers locations accurately and clearly described?                       | 0                                 | 2                                 | 2                                    | 2                                | 2                                          | 2                                         |
| Was accelerometers attachment method clearly described?                               | 0                                 | 0                                 | 2                                    | 1                                | 2                                          | 2                                         |
| Was the signal/data handling described?                                               | 1                                 | 2                                 | 2                                    | 2                                | 2                                          | 2                                         |
| Were the main outcomes measured and the related calculations clearly described?       | 2                                 | 2                                 | 2                                    | 2                                | 2                                          | 2                                         |
| Was the system compared to an acknowledged gold standard?                             | 2                                 | 0                                 | 0                                    | 2                                | 0                                          | 0                                         |
| Were measures of reliability/accuracy of the accelerometers used reported?            | 0                                 | 0                                 | 2                                    | 0                                | 2                                          | 2                                         |
| Were the main findings of the study stated?                                           | 1                                 | 0                                 | 2                                    | 2                                | 2                                          | 2                                         |
| Were the statistical tests appropriate?                                               | 2                                 | 2                                 | 2                                    | 2                                | 2                                          | 2                                         |
| Were limitations of the study clearly described?                                      | 2                                 | 2                                 | 2                                    | 2                                | 2                                          | 2                                         |
| <b>Total score</b> (out of 34)                                                        | 15                                | 21                                | 25                                   | 27                               | 27                                         | 28                                        |
| <b>Percentage score</b>                                                               | <b>44.1%</b>                      | <b>61.8%</b>                      | <b>73.5%</b>                         | <b>79.4%</b>                     | <b>79.4%</b>                               | <b>82.4%</b>                              |
| <b>Quality category</b>                                                               | <b>Medium</b>                     | <b>Medium</b>                     | <b>High</b>                          | <b>High</b>                      | <b>High</b>                                | <b>High</b>                               |

**Table S1.** Quality assessment of included articles (cont.)

| Quality Index Item                                                                    | Iosa, et al. <sup>40</sup><br>(2018) | Jobbágy et al. <sup>48</sup> (2016) | Kim et al. <sup>43</sup><br>(2018) | Kim et al. <sup>44</sup><br>(2018) | Linder et al. <sup>41</sup> (2018) | Mutoh, et al. <sup>32</sup> (2016) | Saether et al. <sup>36</sup> (2015) |
|---------------------------------------------------------------------------------------|--------------------------------------|-------------------------------------|------------------------------------|------------------------------------|------------------------------------|------------------------------------|-------------------------------------|
| Were the research objectives or aims clearly stated?                                  | 2                                    | 1                                   | 2                                  | 2                                  | 2                                  | 2                                  | 2                                   |
| Was the study design clearly described?                                               | 1                                    | 0                                   | 0                                  | 0                                  | 0                                  | 0                                  | 1                                   |
| Was the study population adequately described?                                        | 2                                    | 1                                   | 2                                  | 2                                  | 2                                  | 2                                  | 2                                   |
| Were the eligibility criteria specified?                                              | 1                                    | 0                                   | 2                                  | 1                                  | 1                                  | 2                                  | 2                                   |
| Was the sampling methodology appropriately described?                                 | 0                                    | 0                                   | 2                                  | 2                                  | 0                                  | 0                                  | 0                                   |
| Was the sample size used justified?                                                   | 0                                    | 0                                   | 2                                  | 2                                  | 0                                  | 0                                  | 0                                   |
| Did the method description enable accurate replication of the measurement procedures? | 0                                    | 0                                   | 0                                  | 1                                  | 0                                  | 0                                  | 0                                   |
| Was the equipment design and set up clearly described?                                | 2                                    | 1                                   | 2                                  | 2                                  | 2                                  | 0                                  | 1                                   |
| Were accelerometers locations accurately and clearly described?                       | 2                                    | 0                                   | 2                                  | 2                                  | 2                                  | 2                                  | 2                                   |
| Was accelerometers attachment method clearly described?                               | 2                                    | 1                                   | 1                                  | 2                                  | 2                                  | 2                                  | 2                                   |
| Was the signal/data handling described?                                               | 2                                    | 2                                   | 2                                  | 2                                  | 2                                  | 0                                  | 2                                   |
| Were the main outcomes measured and the related calculations clearly described?       | 2                                    | 1                                   | 1                                  | 1                                  | 2                                  | 1                                  | 1                                   |
| Was the system compared to an acknowledged gold standard?                             | 0                                    | 0                                   | 1                                  | 1                                  | 2                                  | 0                                  | 1                                   |
| Were measures of reliability/accuracy of the accelerometers used reported?            | 0                                    | 0                                   | 0                                  | 0                                  | 2                                  | 0                                  | 1                                   |
| Were the main findings of the study stated?                                           | 2                                    | 1                                   | 2                                  | 2                                  | 0                                  | 2                                  | 2                                   |
| Were the statistical tests appropriate?                                               | 2                                    | 0                                   | 1                                  | 2                                  | 2                                  | 1                                  | 2                                   |
| Were limitations of the study clearly described?                                      | 1                                    | 0                                   | 2                                  | 2                                  | 2                                  | 2                                  | 1                                   |
| <b>Total score</b> (out of 34)                                                        | 21                                   | 8                                   | 25                                 | 26                                 | 23                                 | 16                                 | 22                                  |
| <b>Percentage score</b>                                                               | <b>61.8%</b>                         | <b>23.5%</b>                        | <b>73.5%</b>                       | <b>76.5%</b>                       | <b>67.6%</b>                       | <b>47.1%</b>                       | <b>64.7%</b>                        |
| <b>Quality category</b>                                                               | <b>Medium</b>                        | <b>Low</b>                          | <b>High</b>                        | <b>High</b>                        | <b>High</b>                        | <b>Medium</b>                      | <b>Medium</b>                       |

**Table S1.** Quality assessment of included articles (cont.).

| Quality Index Item                                                                    | Shiratori et al. <sup>42</sup> (2016) | Speedtsberg et al. <sup>33</sup> (2018) | Summa et al. <sup>37</sup> (2015) | Tramontano et al. <sup>34</sup> (2017) | Wolter et al. <sup>35</sup> (2019) |
|---------------------------------------------------------------------------------------|---------------------------------------|-----------------------------------------|-----------------------------------|----------------------------------------|------------------------------------|
| Were the research objectives or aims clearly stated?                                  | 2                                     | 2                                       | 2                                 | 2                                      | 2                                  |
| Was the study design clearly described?                                               | 0                                     | 0                                       | 0                                 | 0                                      | 0                                  |
| Was the study population adequately described?                                        | 2                                     | 0                                       | 1                                 | 0                                      | 1                                  |
| Were the eligibility criteria specified?                                              | 1                                     | 2                                       | 0                                 | 2                                      | 1                                  |
| Was the sampling methodology appropriately described?                                 | 0                                     | 0                                       | 0                                 | 0                                      | 0                                  |
| Was the sample size used justified?                                                   | 0                                     | 0                                       | 0                                 | 0                                      | 1                                  |
| Did the method description enable accurate replication of the measurement procedures? | 1                                     | 0                                       | 1                                 | 0                                      | 1                                  |
| Was the equipment design and set up clearly described?                                | 2                                     | 1                                       | 2                                 | 1                                      | 1                                  |
| Were accelerometers locations accurately and clearly described?                       | 2                                     | 2                                       | 2                                 | 2                                      | 2                                  |
| Was accelerometers attachment method clearly described?                               | 2                                     | 0                                       | 2                                 | 0                                      | 2                                  |
| Was the signal/data handling described?                                               | 2                                     | 2                                       | 2                                 | 0                                      | 0                                  |
| Were the main outcomes measured and the related calculations clearly described?       | 2                                     | 2                                       | 2                                 | 2                                      | 2                                  |
| Was the system compared to an acknowledged gold standard?                             | 2                                     | 0                                       | 0                                 | 2                                      | 0                                  |
| Were measures of reliability/accuracy of the accelerometers used reported?            | 0                                     | 0                                       | 0                                 | 0                                      | 0                                  |
| Were the main findings of the study stated?                                           | 0                                     | 2                                       | 2                                 | 2                                      | 1                                  |
| Were the statistical tests appropriate?                                               | 2                                     | 2                                       | 2                                 | 2                                      | 2                                  |
| Were limitations of the study clearly described?                                      | 2                                     | 2                                       | 0                                 | 2                                      | 0                                  |
| <b>Total score</b> (out of 34)                                                        | 23                                    | 17                                      | 18                                | 17                                     | 16                                 |
| <b>Percentage score</b>                                                               | <b>67.6%</b>                          | <b>44.1%</b>                            | <b>52.9%</b>                      | <b>50%</b>                             | <b>47%</b>                         |
| <b>Quality category</b>                                                               | <b>High</b>                           | <b>Medium</b>                           | <b>Medium</b>                     | <b>Medium</b>                          | <b>Medium</b>                      |
